# Supplementary material
Source: MDPI journal article supplement (https://www.mdpi.com/1424-8247/14/12/1250)
Supplement: s1 [file s1]

## Supplementary

### The Separation of Cannabinoids on sub-2 $\mu\text{m}$ Immobilized Polysaccharide Chiral Stationary Phases

Takafumi Onishi <sup>1</sup>, Weston J. Umstead <sup>2,\*</sup>

**Table S1:** Fastest ten-cannabinoid mixture separation under normal phase conditions  
with Chiralpak IB-U – Analysis Conditions

|                  | <b>Chiralpak IB-U</b>                                                       |
|------------------|-----------------------------------------------------------------------------|
| Column Dimension | 3.0 mm i.d. $\times$ 100 mm L<br>(2 columns coupled)<br>95.7/3.3/1/0.1 = n- |
| Mobile Phase     | Hexane/Isopropanol/Ethanol<br>/Trifluoroacetic acid (v/v/v/v)               |
| Flow Rate        | 0.425 ml/min                                                                |
| Temperature      | 25°C (controlled)                                                           |
| Detection        | 220 nm UV                                                                   |
| Sample           | 10 cannabinoid mixture (1)<br>0.1 mg/ml in<br>Hexane/IPA/EtOH = 96/3/1      |
| Injection Volume | 0.5 $\mu\text{l}$                                                           |

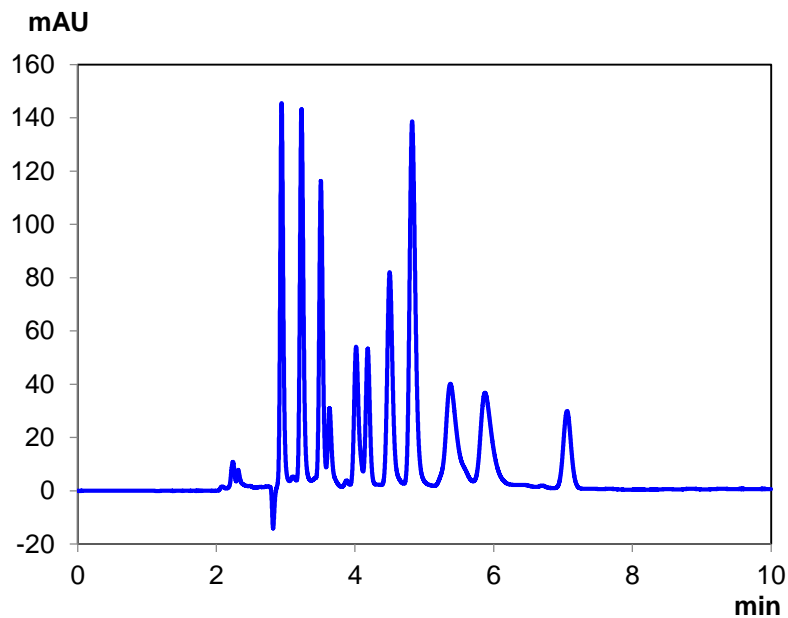

**Figure S1:** Fastest ten-cannabinoid mixture separation under normal phase conditions  
with Chiralpak IB-U - Chromatogram

**Table S2:** Peak Identification for the separation under normal phase conditions with Chiralpak IB-U – Analysis Conditions

|                  | <b>Chiralpak IB-U</b>                                                                                                            |
|------------------|----------------------------------------------------------------------------------------------------------------------------------|
| Column Dimension | 3.0 mm i.d. × 100 mm L<br>(2 columns coupled)                                                                                    |
| Mobile Phase     | 96/3/1/0.1 = n-Hexane/Isopropanol/Ethanol/Trifluoroacetic acid (v/v/v/v)                                                         |
| Flow Rate        | 0.318 ml/min                                                                                                                     |
| Temperature      | 25°C (controlled)                                                                                                                |
| Detection        | 220 nm UV                                                                                                                        |
| Sample           | 10 cannabinoid mixture (1)<br>0.1 mg/ml in Hexane/IPA/EtOH = 96/3/1<br>Individual Samples: 1.0 mg/ml in Hexane/IPA/EtOH = 96/3/1 |
| Injection Volume | 10 cannabinoid mixture - 0.5 µl<br>Individual Samples – 0.1 µl                                                                   |

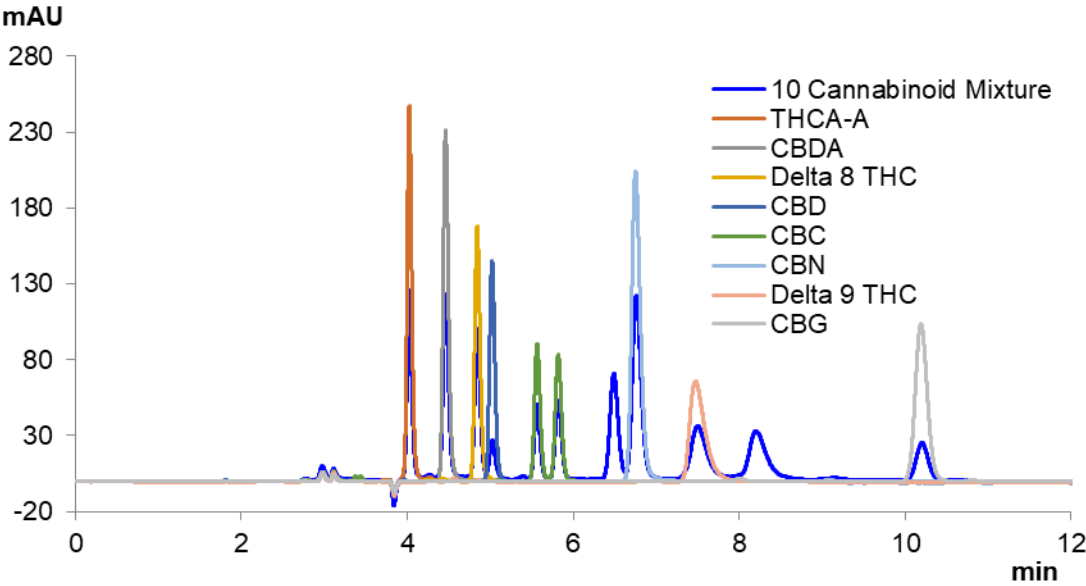

**Figure S2:** Peak Identification for the separation under normal phase conditions with Chiralpak IB-U

**Table S3:** Fastest ten-cannabinoid mixture separation under normal phase conditions with Chiralpak IH-U – Analysis Conditions

| Chiralpak IH-U   |                                                                                  |
|------------------|----------------------------------------------------------------------------------|
| Column Dimension | 3.0 mm i.d. × 100 mm L<br>(2 columns coupled)                                    |
| Mobile Phase     | 96/3/1/0.1 = n-<br>Hexane/Isopropanol/Ethanol<br>/Trifluoroacetic acid (v/v/v/v) |
| Flow Rate        | 0.425 ml/min                                                                     |
| Temperature      | 25°C (controlled)                                                                |
| Detection        | 220 nm UV                                                                        |
| Sample           | 10 cannabinoid mixture (1)<br>0.1 mg/ml in<br>Hexane/IPA/EtOH = 96/3/1           |
| Injection Volume | 0.5 µl                                                                           |

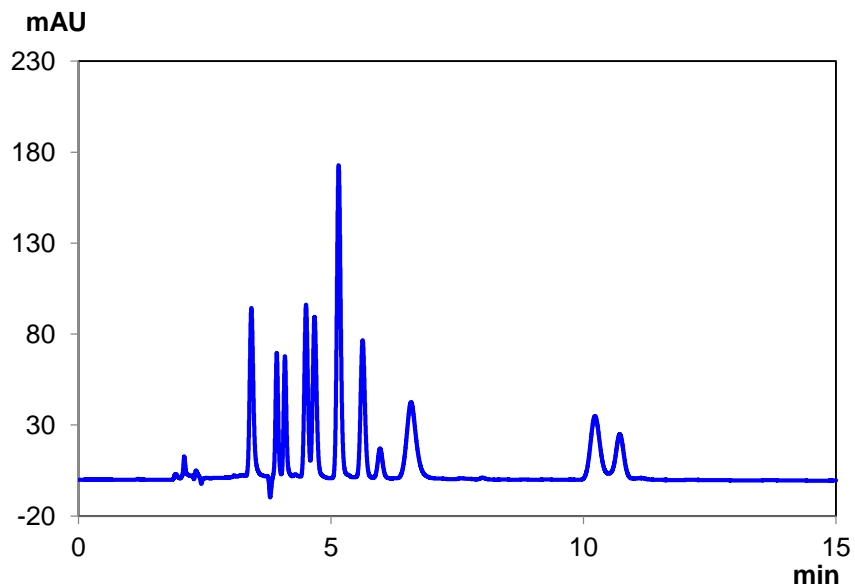

**Figure S3:** Fastest ten-cannabinoid mixture separation under normal phase conditions with Chiralpak IH-U

**Table S4:** Peak Identification for the separation under normal phase conditions with Chiralpak IH-U – Analysis Conditions

| Chiralpak IH-U   |                                                               |
|------------------|---------------------------------------------------------------|
| Column Dimension | 3.0 mm i.d. × 100 mm L<br>(2 columns coupled)                 |
|                  | 96/3/1/0.1 = n-                                               |
| Mobile Phase     | Hexane/Isopropanol/Ethanol<br>/Trifluoroacetic acid (v/v/v/v) |
| Flow Rate        | 0.425 ml/min                                                  |
| Temperature      | 25°C (controlled)                                             |
| Detection        | 220 nm UV                                                     |
|                  | 10 cannabinoid mixture (1)                                    |
|                  | 0.1 mg/ml in                                                  |
| Sample           | Hexane/IPA/EtOH = 96/3/1                                      |
|                  | Individual Samples: 1.0                                       |
|                  | mg/ml in Hexane/IPA/EtOH                                      |
|                  | = 96/3/1                                                      |
| Injection Volume | 10 cannabinoid mixture - 0.5                                  |
|                  | µl                                                            |
|                  | Individual Samples – 0.1 µl                                   |

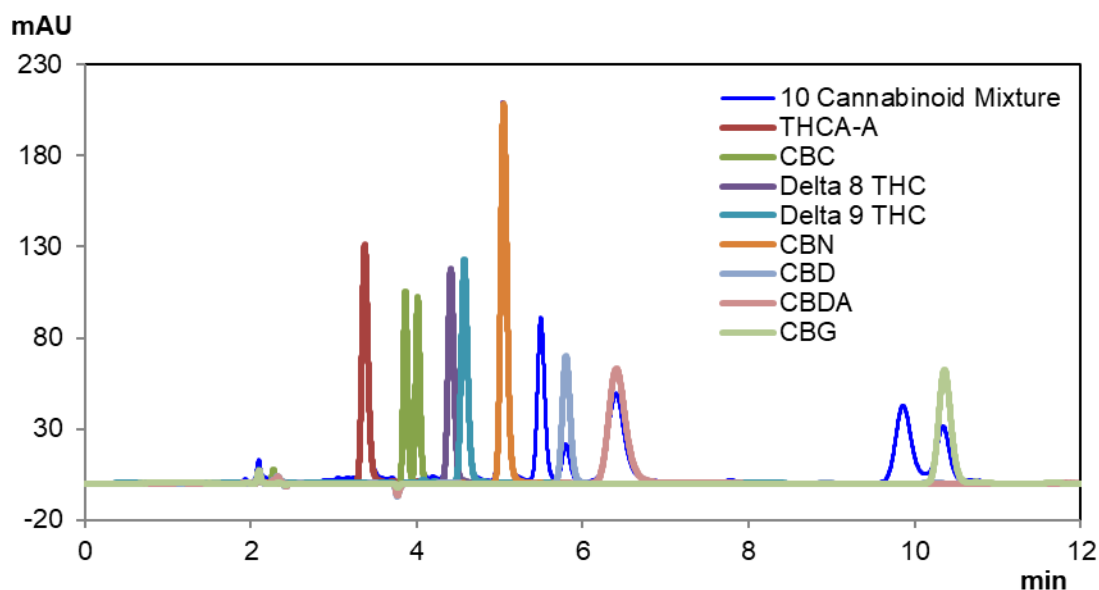

**Figure S4:** Peak Identification for the separation under normal phase conditions with Chiralpak IH-U

**Table S5:** Peak Identification for the separation under reversed phase conditions with Chiralpak IG-U – Analysis Conditions

| Chiralpak IG-U   |                                                                     |
|------------------|---------------------------------------------------------------------|
| Column Dimension | 3.0 mm i.d. × 100 mm L<br>45/55/0.1 =                               |
| Mobile Phase     | Water/Acetonitrile/Trifluoroacetic acid (v/v/v)                     |
| Flow Rate        | 0.800 ml/min                                                        |
| Temperature      | 25°C (controlled)                                                   |
| Detection        | 220 nm UV                                                           |
| Sample           | 10 cannabinoid mixture (1)<br>0.1 mg/ml in Water/ACN =<br>47.5/52.5 |
|                  | Individual Samples: 1.0<br>mg/ml in Water/ACN =<br>47.5/52.5        |
| Injection Volume | 10 cannabinoid mixture - 0.5<br>μl                                  |
|                  | Individual Samples – 0.1 μl                                         |

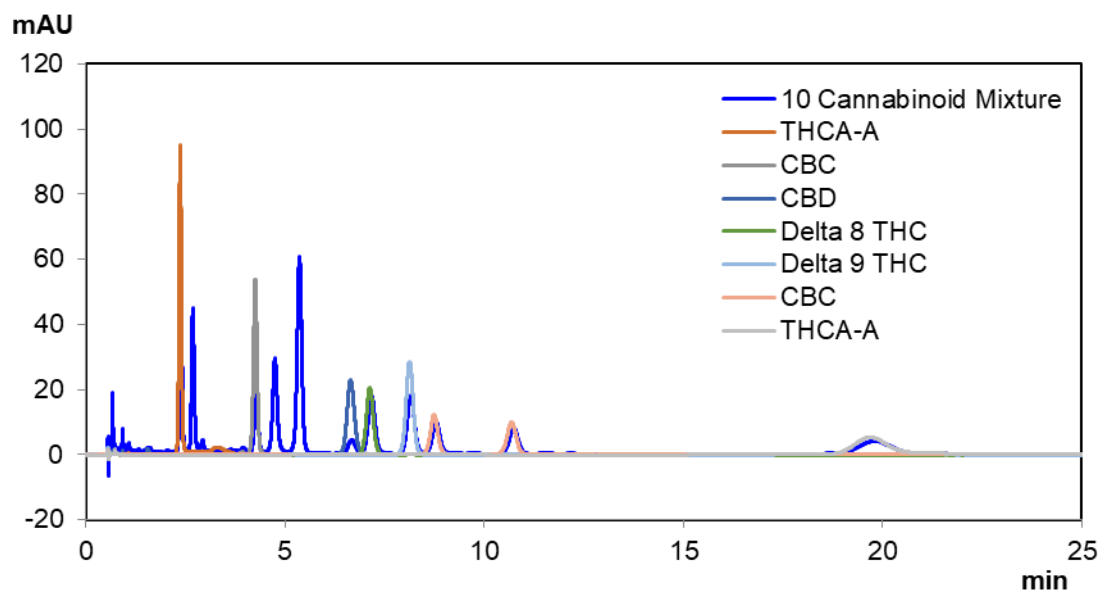

**Figure S5:** Peak Identification for the separation under reversed phase conditions with Chiralpak IG-U

**Table S6:** Peak Identification for the separation under reversed phase conditions with Chiralpak ID-U+IC-U – Analysis Conditions

|                  | Chiralpak ID-U+IC-U                                                                                                                 |
|------------------|-------------------------------------------------------------------------------------------------------------------------------------|
| Column Dimension | 3.0 mm i.d. × 100 mm L<br>(2 columns coupled)<br>42.5/57.5/0.1 =                                                                    |
| Mobile Phase     | Water/Acetonitrile/Trifluoroacetic acid (v/v/v)                                                                                     |
| Flow Rate        | 0.425 ml/min                                                                                                                        |
| Temperature      | 25°C (controlled)                                                                                                                   |
| Detection        | 220 nm UV                                                                                                                           |
| Sample           | 10 cannabinoid mixture (1)<br>0.1 mg/ml in Water/ACN =<br>47.5/52.5<br>Individual Samples: 1.0<br>mg/ml in Water/ACN =<br>47.5/52.5 |
| Injection Volume | 10 cannabinoid mixture - 0.5<br>μl<br>Individual Samples – 0.1 μl                                                                   |

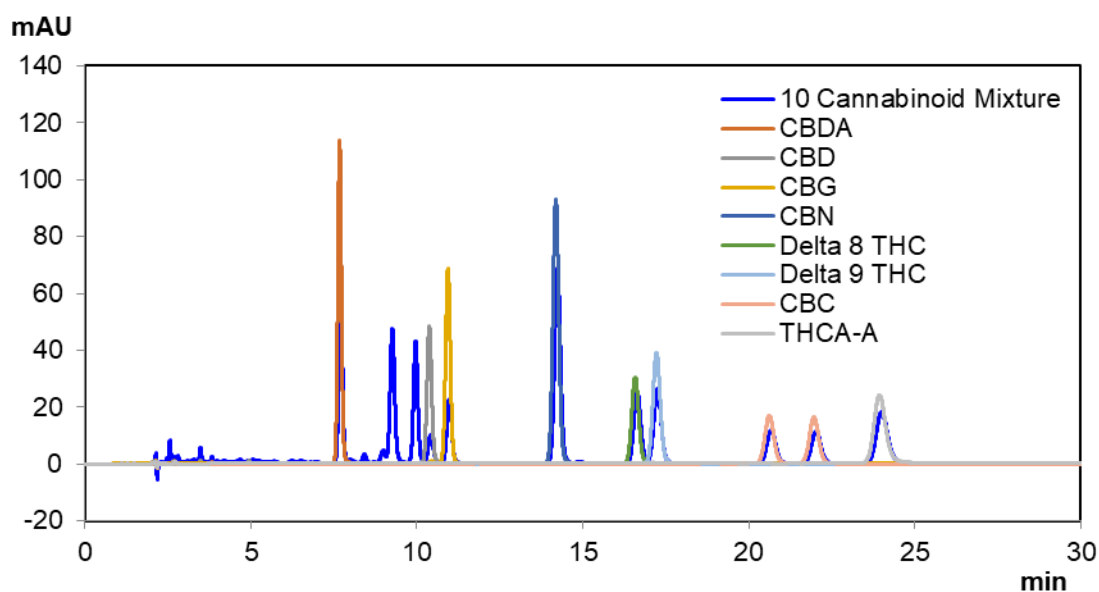

**Figure S6:** Peak Identification for the separation under reversed phase conditions with Chiralpak ID-U + IC-U

**Table S7:** Peak Identification for the separation under reversed phase conditions with Chiralpak ID-U – Analysis Conditions

| Chiralpak ID-U   |                                                 |
|------------------|-------------------------------------------------|
| Column Dimension | 3.0 mm i.d. × 100 mm L                          |
|                  | 55/45/0.1 =                                     |
| Mobile Phase     | Water/Acetonitrile/Trifluoroacetic acid (v/v/v) |
| Flow Rate        | 0.600 ml/min                                    |
| Temperature      | 25°C (controlled)                               |
| Detection        | 220 nm UV                                       |
|                  | 10 cannabinoid mixture (1)                      |
|                  | 0.1 mg/ml in Water/ACN =                        |
|                  | 47.5/52.5                                       |
| Sample           | Individual Samples: 1.0                         |
|                  | mg/ml in Water/ACN =                            |
|                  | 47.5/52.5                                       |
|                  | 10 cannabinoid mixture - 0.5                    |
| Injection Volume | µl                                              |
|                  | Individual Samples – 0.1 µl                     |

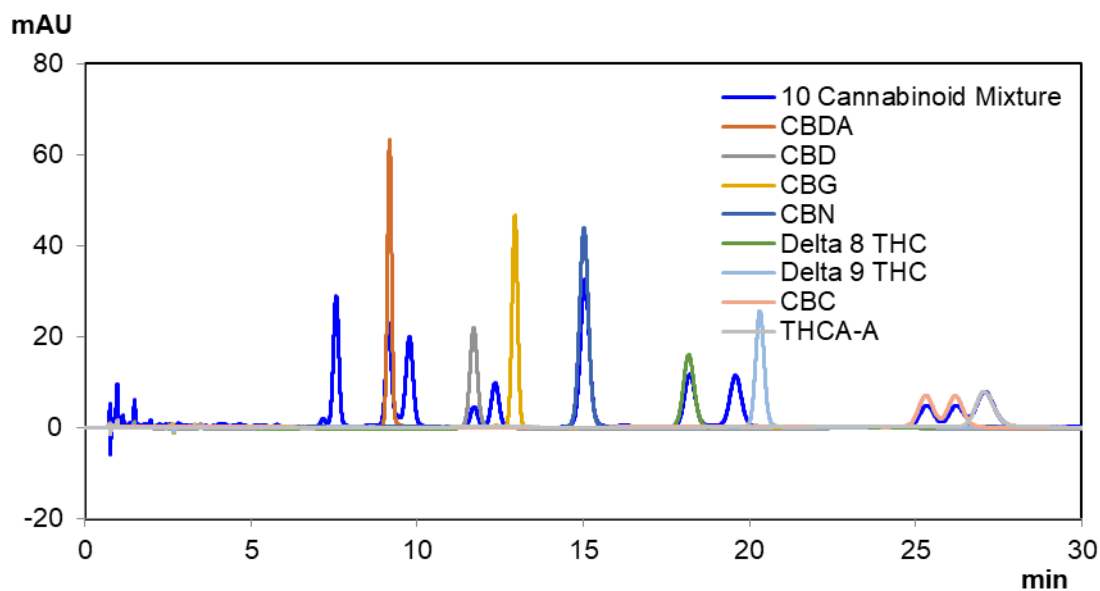

**Figure S7:** Peak Identification for the separation under reversed phase conditions with Chiralpak ID-U
